# Supplementary material for: Muscular strategy shift in human running: dependence of running speed on hip and ankle muscle performance
Source: Oxford University Press journal article supplement (doi:10.1242/jeb.064527), 2012-05-09
Supplement: jeb064527tables1.pdf [file jeb064527tables1.pdf]

**Supplementary Table S1:** Description of the marker locations placed on the body.

|                    |                                                                                                        |
|--------------------|--------------------------------------------------------------------------------------------------------|
| <b>Trunk</b>       |                                                                                                        |
| LSH                | 14mm marker over tip of left shoulder (AC joint)                                                       |
| RSH                | 14mm marker over tip of right shoulder (AC joint)                                                      |
| C7                 | 14mm marker over spinous process of 7 <sup>th</sup> cervical vertebra                                  |
| T7                 | 14mm marker over spinous process of 7 <sup>th</sup> thoracic vertebra                                  |
| MAN                | 14mm marker over manubrium of thoracic cage                                                            |
| <b>Pelvis</b>      |                                                                                                        |
| RASI               | 14mm marker placed over right anterior superior iliac spine (ASIS)                                     |
| LASI               | 14mm marker placed over left anterior superior iliac spine (ASIS)                                      |
| SACR               | 14mm marker placed over midpoint between left and right posterior superior iliac spines (PSIS)         |
| <b>Right Thigh</b> |                                                                                                        |
| RTHAP              | 14mm marker located at the proximal anterior aspect of the right thigh                                 |
| RTHAD              | 14mm marker located at the distal anterior aspect of the right thigh                                   |
| RTHLP              | 14mm marker located at the proximal lateral aspect of the right thigh (upper end of thermoplastic bar) |
| RTHLD              | 14mm marker located at the proximal distal aspect of the right thigh (lower end of thermoplastic bar)  |
| RLEPI              | 14mm marker over lateral epicondyle of right femur                                                     |
| RMEPI*             | 14mm marker over medial epicondyle of right femur                                                      |
| <b>Left Thigh</b>  |                                                                                                        |
| LTHAP              | 14mm marker located at the proximal anterior aspect of the left thigh                                  |
| LTHAD              | 14mm marker located at the distal anterior aspect of the left thigh                                    |
| LTHLP              | 14mm marker located at the proximal lateral aspect of the left thigh (upper end of thermoplastic bar)  |
| LTHLD              | 14mm marker located at the proximal distal aspect of the left thigh (lower end of thermoplastic bar)   |
| LLEPI              | 14mm marker over lateral epicondyle of left femur                                                      |
| LMEPI*             | 14mm marker over medial epicondyle of left femur                                                       |
| <b>Right shank</b> |                                                                                                        |
| RTIAP              | 14mm marker located on the proximal 1/3 of the anterior shaft of the right tibia                       |
| RTIAD              | 14mm marker located on the distal 1/3 of the anterior shaft of the right tibia                         |
| RTILAT             | 14mm marker located on the mid lateral aspect of the right tibia                                       |
| RLMAL              | 14mm marker located over the right lateral malleolus                                                   |
| RMMAL*             | 14mm marker located over the right medial malleolus                                                    |
| <b>Left Shank</b>  |                                                                                                        |
| LTIAP              | 14mm marker located on the proximal 1/3 of the anterior shaft of the left tibia                        |
| LTIAD              | 14mm marker located on the distal 1/3 of the anterior shaft of the left tibia                          |
| LTIAT              | 14mm marker located on the mid lateral aspect of the left tibia                                        |
| LLMAL              | 14mm marker located over the left lateral malleolus                                                    |
| LMMAL*             | 14mm marker located over the left medial malleolus                                                     |
| <b>Right foot</b>  |                                                                                                        |
| RHEEL              | 14mm marker on distal aspect of bisection of right posterior calcaneum                                 |
| RMID               | 14mm marker on medial right midfoot                                                                    |
| RLATMID            | 14mm marker on lateral right midfoot                                                                   |
| RP1MT              | 14mm marker on medial aspect of right 1 <sup>st</sup> MTP joint                                        |
| RP5MT              | 14mm marker on lateral aspect of right 5 <sup>th</sup> MTP joint                                       |
| RTOE               | 14mm marker on distal end of 1 <sup>st</sup> toe of right foot                                         |
| <b>Left foot</b>   |                                                                                                        |
| LHEEL              | 14mm marker on distal aspect of bisection of left posterior calcaneum                                  |
| LMID               | 14mm marker on medial left midfoot                                                                     |
| LLATMID            | 14mm marker on lateral left midfoot                                                                    |
| LP1MT              | 14mm marker on medial aspect of left 1 <sup>st</sup> MTP joint                                         |
| LP5MT              | 14mm marker on lateral aspect of left 5 <sup>th</sup> MTP joint                                        |
| LTOE               | 14mm marker on distal end of 1 <sup>st</sup> toe of left foot                                          |
| <b>Right arm</b>   |                                                                                                        |
| RARM               | 14mm marker located at the half way point laterally on the right humerus                               |
| RELB               | 14mm marker over lateral epicondyle of right humerus                                                   |
| RFOREARM           | 14mm marker located at the half way point laterally on the right forearm                               |
| RWR                | 14mm marker over dorsal aspect of right wrist                                                          |
| <b>Left arm</b>    |                                                                                                        |
| LARM               | 14mm marker located at the half way down laterally on the left humerus                                 |
| LELB               | 14mm marker over lateral epicondyle of left humerus                                                    |
| LFOREARM           | 14mm marker located at the half way point laterally on the left forearm                                |
| LWR                | 14mm marker over dorsal aspect of left wrist                                                           |

\* Markers required for static calibration trial only
